# Supplementary material
Source: MDPI journal article supplement (https://www.mdpi.com/2313-433X/8/5/120)
Supplement: s1 [file s1]

**Table S1.** Notation and Abbreviation Index Table.

| Notation           | Description                                                                           |
|--------------------|---------------------------------------------------------------------------------------|
| $S_I$              | ECG signal from Lead I                                                                |
| $S_{V2}$           | ECG signal from Lead V2                                                               |
| $t_i$              | The time lag $t$ introduced to $S_{V2}$ at $i^{\text{th}}$ step                       |
| $\tilde{S}_{V2_i}$ | The time shifted ECG signal from Lead V2 by the time lag $t_i$                        |
| $r_i$              | The correlation between Lead I and time-shifted Lead V2 signals by the time lag $t_i$ |
| $t_{max}$          | The time lag with maximal correlation between two signals                             |
| $\tau$             | Optimal time alignment determined by the proposed algorithm                           |
| Abbreviation       | Description                                                                           |
| BW                 | Baseline wandering                                                                    |
| dSQI               | Dynamic signal quality index                                                          |
| DTW                | Dynamic time warping                                                                  |
| EM                 | Electrode motion artifact                                                             |
| INCART             | The St. Petersburg Institute of Cardiological Technics                                |
| MA                 | Muscle artifact                                                                       |
| SQI                | Signal quality index                                                                  |
